# Supplementary material for: Fitness Landscapes of Functional RNAs
Source: Life (Basel). 2015 Aug 21;5(3):1497–517. doi: 10.3390/life5031497 (PMC4598650; doi:10.3390/life5031497)
Supplement: Supplementary File 1 [file life-05-01497-s001.xlsx]

## Sheet: Single mutants
Position	Structure	A	C	G	U		A	C	G	U	Region	Notes
640	.	0	0	-1	4		n.a.	n.a.	1	n.a.	II
641	.	0	-1	0	0	neutral	n.a.	1	n.a.	n.a.	II
642	.	0	0	-1	0	neutral	n.a.	n.a.	1	n.a.	II
643	.	0	4	-1	0		n.a.	n.a.	1	n.a.	II
644	.	0	0	0	-1	neutral	n.a.	n.a.	n.a.	1	II
645	.	-1	4	2	4		1	n.a.	n.a.	n.a.	II
646	(	2	2	-1	2	mismatch	n.a.	n.a.	1	n.a.	II
647	(	4	0	2	-1		n.a.	n.a.	n.a.	1	II
648	(	-1	46	0	2		1	n.a.	n.a.	n.a.	II
649	(	-1	21	0	2		1	n.a.	n.a.	n.a.	II
650	(	4	4	-1	30		n.a.	0.12	n.a.	n.a.	II
651	(	2	-1	19	0		n.a.	1	n.a.	n.a.	II
652	.	-1	0	2	0		1	0.17	0.01	0.24	II
653	(	15	2	-1	2		n.a.	0	1	n.a.	II
654	(	16	4	-1	14		n.a.	n.a.	1	n.a.	II
655	(	2	2	-1	2	mismatch	n.a.	0	n.a.	n.a.	II
656	.	-1	2	0	2	critical	n.a.	0.0029	0.0612	0.00194	J236
657	.	-1	3	0	0	critical	n.a.	n.a.	n.a.	0.06311	J236
658	(	17	-1	27	0	structural critical	n.a.	1	n.a.	n.a.	III
659	(	17	17	17	-1	structural critical	0	n.a.	n.a.	1	III
660	(	17	-1	17	18	structural critical	n.a.	1	n.a.	n.a.	III
661	(	-1	16	0	2		1	n.a.	n.a.	n.a.	III
662	(	2	-1	2	17		n.a.	1	0.23	n.a.	III
663	(	2	-1	6	0		n.a.	1	n.a.	n.a.	III
664	.	2	0	2	-1		0.116505	n.a.	n.a.	1	J345
665	.	2	-1	2	0	structural critical (exp)	0.0145631	1	0.01	n.a.	J345	activity of C665U is not available!
666	(	6	-1	2	0		n.a.	1	n.a.	n.a.	IV
667	(	-1	32	0	4		1	n.a.	n.a.	n.a.	IV
668	(	-1	32	0	2		1	n.a.	n.a.	n.a.	IV
669	(	2	2	2	-1	mismatch	n.a.	n.a.	n.a.	1	IV
670	(	2	16	2	-1		n.a.	n.a.	n.a.	1	IV
671	(	16	16	16	-1	structural.critical	n.a.	n.a.	n.a.	1	IV
672	(	4	-1	4	0		n.a.	1	n.a.	n.a.	IV
673	(	-1	2	0	2	mismatch	1	n.a.	n.a.	n.a.	IV
674	.	0	0	-1	0	neutral	n.a.	n.a.	1	n.a.	IV
675	.	0	0	0	-1	neutral	n.a.	n.a.	n.a.	1	IV
676	.	-1	0	0	0	neutral	1	n.a.	n.a.	n.a.	IV
677	.	0	-1	0	0	neutral	n.a.	1	n.a.	n.a.	IV
678	)	2	2	2	-1	mismatch	n.a.	n.a.	n.a.	1	IV
679	)	16	36	-1	16	structural.critical	n.a.	n.a.	1	n.a.	IV
680	)	-1	36	0	16	structural.critical	1	n.a.	n.a.	n.a.	IV
681	)	-1	2	0	2	mismatch	1	n.a.	n.a.	n.a.	IV
682	)	-1	2	0	2	mismatch	1	n.a.	n.a.	n.a.	IV
683	)	2	16	2	-1		n.a.	n.a.	n.a.	1	IV
684	)	4	12	2	-1		n.a.	n.a.	n.a.	1	IV
685	)	2	6	-1	2		n.a.	n.a.	1	n.a.	IV
686	.	2	2	2	-1	structural critical (exp)	0.0058	n.a.	n.a.	n.a.	J345
687	(	2	-1	2	2	mismatch	n.a.	1	n.a.	n.a.	V
688	(	0	4	-1	2		n.a.	n.a.	1	n.a.	V
689	(	2	6	2	-1		n.a.	n.a.	n.a.	1	V
690	(	-1	14	0	2		1	n.a.	n.a.	n.a.	V
691	(	0	24	-1	2		n.a.	n.a.	1	n.a.	V
692	(	2	-1	2	0	mismatch	n.a.	1	n.a.	n.a.	V
693	(	-1	2	0	2	mismatch	1	n.a.	n.a.	n.a.	V
694	(	34	16	-1	4		n.a.	n.a.	1	n.a.	V
695	(	2	2	2	-1	mismatch	n.a.	n.a.	0.37037	1	V
696	.	2	0	2	-1		0.03	0.183	0.024	1	V
697	.	0	0	-1	0	neutral, critical	0	0	1	0.001	V
698	.	-1	0	0	0	neutral, critical	1	0.041	0	0	V
699	.	0	-1	0	0	neutral, critical	0.006	1	0	0.018	V
700	.	2	0	2	-1		0.555	0.27	1	1	V
701	)	-1	2	0	2	mismatch	1	0.04	n.a.	n.a.	V
702	)	4	-1	2	0		n.a.	1	n.a.	n.a.	V
703	)	35	2	35	-1	structural critical	n.a.	n.a.	n.a.	1	V
704	)	2	2	-1	2	mismatch	n.a.	n.a.	1	n.a.	V
705	)	36	0	2	-1		n.a.	0.873786	n.a.	1	V
706	)	2	2	2	-1	mismatch	n.a.	n.a.	n.a.	1	V
707	)	-1	2	0	2	mismatch	1	n.a.	n.a.	n.a.	V
708	)	4	0	2	-1		n.a.	0.873786	n.a.	1	V
709	)	2	2	-1	2	mismatch	n.a.	n.a.	1	n.a.	V
710	.	2	0	2	-1	structural critical (exp)	0.00194175	0.0291262	n.a.	1	J345
711	.	0	0	-1	0	neutral	n.a.	1	1	0.873786	J345
712	.	-1	0	6	0	structural critical (exp)	n.a.	n.a.	0.00582524	0.00485437	J345
713	.	0	0	2	-1	critical	0.0194175	n.a.	n.a.	1	J345
714	.	2	0	2	-1		0.135922	n.a.	n.a.	1	J345
715	)	2	12	-1	19		n.a.	n.a.	1	n.a.	III
716	)	12	20	-1	12		n.a.	0.21	1	n.a.	III
717	)	16	17	2	-1		n.a.	n.a.	n.a.	1	III
718	.	-1	0	0	2		1	n.a.	n.a.	n.a.	III
719	)	17	17	-1	17	structural.critical	n.a.	n.a.	1	n.a.	III
720	)	-1	17	0	16		1	n.a.	n.a.	0.05	III
721	)	17	17	-1	18	structural.critical	n.a.	n.a.	1	n.a.	III
722	(	2	2	-1	3		n.a.	n.a.	1	n.a.	VI
723	(	15	-1	15	0		n.a.	1	n.a.	n.a.	VI
724	(	2	22	2	-1		n.a.	n.a.	n.a.	1	VI
725	.	-1	0	2	0		1	1.6	0.55	1.5	VI
726	.	-1	0	0	2		1	1.7	1.2	1.1	VI
727	(	6	4	-1	4		1	n.a.	1	n.a.	VI
728	(	2	0	2	-1	mismatch	n.a.	n.a.	n.a.	1	VI
729	.	0	0	-1	2		n.a.	n.a.	1	n.a.	VI
730	.	-1	4	2	4	critical	1	0.055	0.011	0.036	VI
731	(	2	-1	27	0		0.0149254	1	0.0384615	0.0384615	VI
732	(	0	2	-1	8		n.a.	n.a.	1	n.a.	VI
733	(	0	8	-1	2		n.a.	n.a.	1	n.a.	VI
734	(	2	8	2	-1		n.a.	n.a.	n.a.	1	VI
735	(	-1	2	0	2	mismatch	1	n.a.	n.a.	n.a.	VI
736	(	2	0	2	-1	mismatch	n.a.	n.a.	n.a.	1	VI
737	(	2	2	2	-1	mismatch	n.a.	n.a.	n.a.	1	VI
738	(	2	2	-1	2	mismatch	n.a.	n.a.	1	n.a.	VI
739	(	0	2	-1	2	mismatch	n.a.	n.a.	1	n.a.	VI
740	(	2	-1	2	2	mismatch	n.a.	1	n.a.	n.a.	VI
741	.	0	0	-1	0	neutral	n.a.	n.a.	1	n.a.	VI
742	.	0	0	0	-1	neutral	n.a.	n.a.	n.a.	1	VI
743	.	-1	0	0	0	neutral	1	n.a.	n.a.	n.a.	VI
744	.	-1	0	0	0	neutral	1	n.a.	n.a.	n.a.	VI
745	)	2	2	-1	2	mismatch	n.a.	n.a.	1	n.a.	VI
746	)	4	0	2	-1		n.a.	n.a.	n.a.	1	VI
747	)	2	-1	2	0	mismatch	n.a.	1	n.a.	n.a.	VI
748	)	-1	2	0	2	mismatch	1	n.a.	n.a.	n.a.	VI
749	)	0	2	-1	2	mismatch	n.a.	n.a.	1	n.a.	VI
750	)	2	2	2	-1	mismatch	n.a.	n.a.	n.a.	1	VI
751	)	-1	2	0	2	mismatch	1	n.a.	n.a.	n.a.	VI
752	)	2	0	2	-1	mismatch	n.a.	0.8	n.a.	1	VI
753	)	2	0	2	-1	mismatch	n.a.	0.42	n.a.	1	VI
754	)	2	8	-1	8		0.025	0.0120482	1	0.0222222	VI
755	.	0	-1	0	2	critical	0.84	1	0.02	0.17	VI	why does G decrease activity this much?
756	.	-1	2	0	2	critical	1	0.00184466	0.00262136	0.00126214	VI
757	)	0	4	-1	4	critical	0.044	0.015	1	0.018	VI
758	)	6	-1	6	6		n.a.	1	n.a.	n.a.	VI
759	.	-1	0	0	2		1	n.a.	n.a.	n.a.	VI
760	.	0	-1	0	2		n.a.	1	n.a.	n.a.	VI
761	)	-1	2	0	6		1	n.a.	n.a.	n.a.	VI
762	)	15	15	-1	15	structural.critical	n.a.	n.a.	n.a.	1	VI
763	)	11	-1	18	0		n.a.	1	n.a.	n.a.	VI
764	.	-1	18	0	0		1	n.a.	n.a.	0.873786	J236
765	.	0	-1	0	0	neutral	n.a.	1	n.a.	0.543689	J236
766	.	-1	0	0	0	neutral	1	n.a.	n.a.	0.0543689	J236
767	.	-1	0	0	0	neutral, critical	1	n.a.	n.a.	0.0475728	J236
768	.	0	2	-1	2	critical	0.572816	n.a.	1	0.015534	J236
769	)	15	-1	15	2		n.a.	n.a.	0.18	n.a.	II
770	)	18	-1	2	0		n.a.	1	n.a.	n.a.	II
771	)	17	-1	17	2		n.a.	1	0	n.a.	II
772	)	2	19	-1	2		n.a.	n.a.	1	n.a.	II
773	)	46	-1	2	0		n.a.	1	0.29	n.a.	II
774	)	2	21	2	-1		n.a.	n.a.	n.a.	1	II
775	)	10	6	10	-1		n.a.	n.a.	n.a.	1	II
776	)	0	6	-1	6		n.a.	n.a.	1	n.a.	II
777	)	2	-1	2	2	mismatch	n.a.	1	n.a.	n.a.	II
778	.	0	0	-1	4		n.a.	n.a.	1	n.a.	II
779	.	-1	4	0	0		1	n.a.	n.a.	n.a.	II
780	.	0	4	-1	0		n.a.	n.a.	1	n.a.	II
781	.	-1	4	0	4		1	n.a.	n.a.	n.a.	II
782	.	-1	6	4	0		1	n.a.	n.a.	n.a.	II
783	.	0	0	0	-1	neutral	n.a.	n.a.	n.a.	1	II

## Sheet: Base-pair mutants
Position		AU	UA	GC	CG	GU	UG	notes	AU	UA	GC	CG	GU	UG
646	777	0	0	-1	0	2	0	GU/UG not neutral			1
647	776	0	0	0	0	0	-1	neutral						1
648	775	-1	0	0	0	0	0	neutral	1
649	774	-1	0	0	0	0	0	neutral	1
650	773	0	0	-1	0	0	0	neutral			1	1.27
651	772	0	0	0	-1	2	0	GU/UG not neutral				1
653	771	2	0	-1	0	2	0	GU/UG not neutral			1	0.09
654	770	0	0	-1	0	0	0	neutral			1
655	769	0	0	-1	0	2	14	strucutrally critical			1	1.78 / 1.32
658	721	18	0	0	-1	18	0	strucutrally critical			1.34951	1
659	720	0	-1	0	0	0	0	neutral	0.77 / 1.19	1
660	719	0	4	0	-1	0	18	strucutrally critical			1.16505	1
661	717	-1	2	0	4	0	2	strucutrally critical	1	0.582524				0.06
662	716	0	0	0	-1	0	17	GU/UG not neutral			0.58 / 0.94	1
663	715	0	0	0	-1	19	0	GU/UG not neutral			0.262136	1
666	685	6	0	0	-1	0	0				0.0291262	1
667	684	-1	0	0	0	0	0	neutral	1
668	683	-1	0	0	0	0	0	neutral	1
669	682	0	-1	0	0	0	0	neutral		1
670	681	0	-1	0	0	0	0	neutral		1
671	680	0	-1	0	0	0	0	neutral		1
672	679	0	0	0	-1	0	0	neutral				1
673	678	-1	0	0	0	0	0	neutral	1
687	709	0	0	0	-1	0	2	GU/UG not neutral			0.00776699	1
688	708	0	0	0	0	-1	0	neutral					1
689	707	0	-1	0	0	0	0	neutral		1
690	706	-1	0	0	0	0	0	neutral	1					0.07
691	705	0	0	0	0	-1	0	neutral					1
692	704	0	0	0	-1	0	0	neutral				1
693	703	-1	0	0	0	0	0	neutral	1
694	702	0	0	-1	0	0	0	neutral			1
695	701	0	-1	0	0	0	0	neutral		1	1.67	0.243902
722	763	0	0	-1	0	0	7	GU/UG not neutral			1	0.815534
723	762	0	0	0	-1	23	0	GU/UG not neutral			0.84	1
724	761	0	-1	0	0	18	0	GU/UG not neutral	0.21	1
727	760	6	4	-1	4	6	4	strucutrally critical			1	0.35
728	759	0	0	0	0	0	-1	neutral	1.3					1
731	754	0	0	0	-1	0	0	neutral	0.120482	0.30303	0.042	1
732	753	0	0	0	0	-1	0	neutral					1
733	752	0	0	0	0	-1	0	neutral					1
734	751	0	-1	0	0	0	0	neutral		1
735	750	-1	0	0	0	0	0	neutral	1
736	749	0	0	0	0	0	-1	neutral						1
737	748	0	-1	0	0	0	0	neutral		1
738	747	0	0	-1	0	0	0	neutral			1
739	746	0	0	0	0	-1	0	neutral					1
740	745	0	0	0	-1	0	2	GU/UG not neutral				1
